# Supplementary material for: Detection of Cu 2+ Ions Through Colorimetric Methods Utilising a Schiff-Base Probe, Along with its Application in Actual Water Samples and Theoretical Insights
Source: Research Square preprint supplement (doi:10.21203/rs.3.rs-7335025/v1), 2025-08-29
Supplement: Supplementary file 1 [file 277dc5a5faf92e71422d9b2a.docx]

**SUPPORTING INFORMATION**

**Detection of Cu2+ Ions Through Colorimetric Methods Utilising a Schiff-Base Probe, Along with its Application in Actual Water Samples and Theoretical Insights.**

*Ram Kumara, b, Bholey Singhc* Parveen Gahlyana, Abhishek Vermad, Tanya Goele Rita Kakkarf,* *Balaram Panib**

*aDepartment of Chemistry, University of Delhi, Delhi 110007, India*

*bDepartment of Chemistry, Bhaskaracharya College of Applied Sciences, University of Delhi, New Delhi 110075, India*

*cDepartment of Chemistry, Swami Shraddhanand College, University of Delhi, Delhi 110036, India*

*dDepartment of Chemistry, Kirori Mal College, University of Delhi, Delhi 110007, India*

*eDr. B.R. Ambedkar Center for Biomedical Research,* *University of Delhi, Delhi 110007, India*

*fComputational Chemistry Group, Department of Chemistry, University of Delhi, Delhi 110007, India*

** Corresponding author*

*Email:* [*bholeysingh@ss.du.ac.in*](mailto:bholeysingh@ss.du.ac.in)*,* [*balarampani63@gmail.com*](mailto:balarampani63@gmail.com)

**Figure Caption**

**Figure S1.** HRMS spectrum of **L1**in methanol

**Figure S2.** FTIR spectrum of **L1**.

**Figure S3.** 1H NMR of compound **L1** in (DMSO-*d6,* 400 MHz)

**Figure S4.** 13C NMR of compound **L1** in (DMSO-*d6*, 100 MHz)

**Figure S5.** Optimized geometry of ligand **L1**, showing atomic numbering

**Figure S6.** (a) Electron density (isovalue = 0.001 electrons/bohr3) (b) molecular electrostatic potential (ESP) (isovalue = -42.9541 kcal mol-1) (c) Highest occupied molecular orbital (HOMO) and (d) Lowest unoccupied molecular orbital (LUMO) (isovalue = -0.05 au) of ligand **L1**

**Figure S7.** Optimized geometry of the copper complex

**Figure S8.** HOMOs and LUMOs for the two spin states of copper complex

**Table S1.** Excitation energies and oscillator strengths of ligand **L1.**


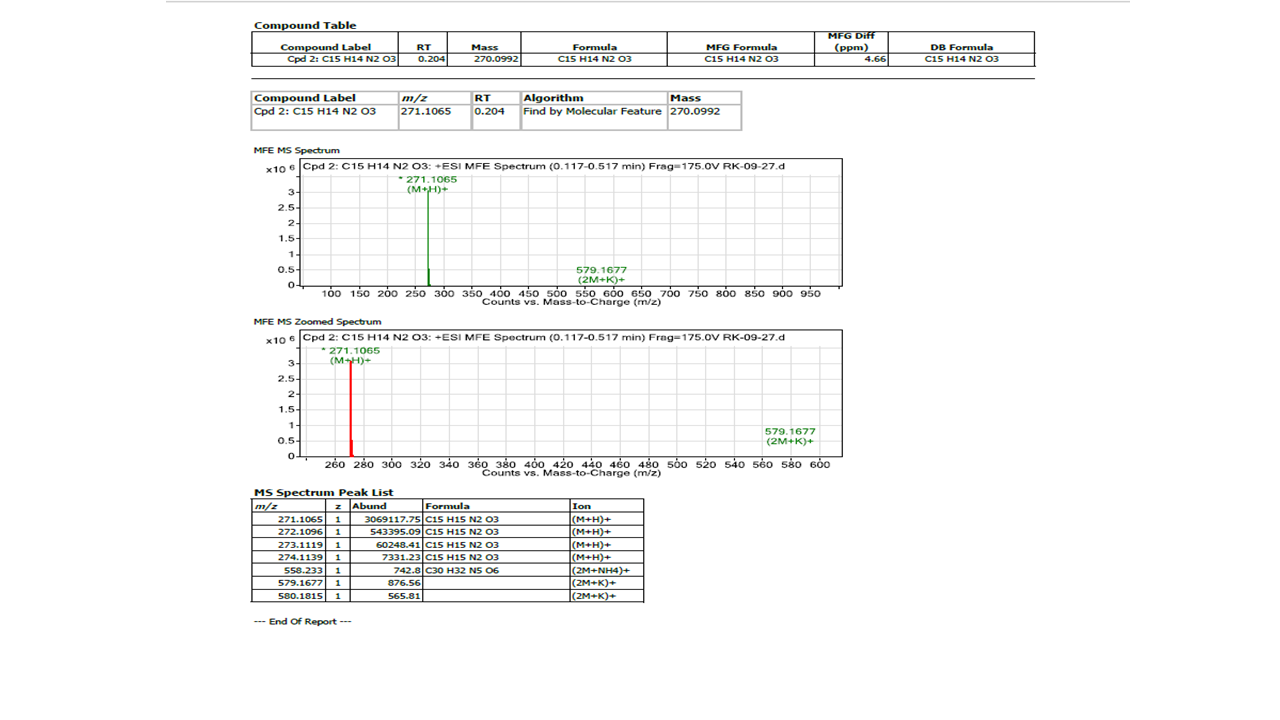


**Figure S1**.HRMS spectrum of **L1**in methanol.


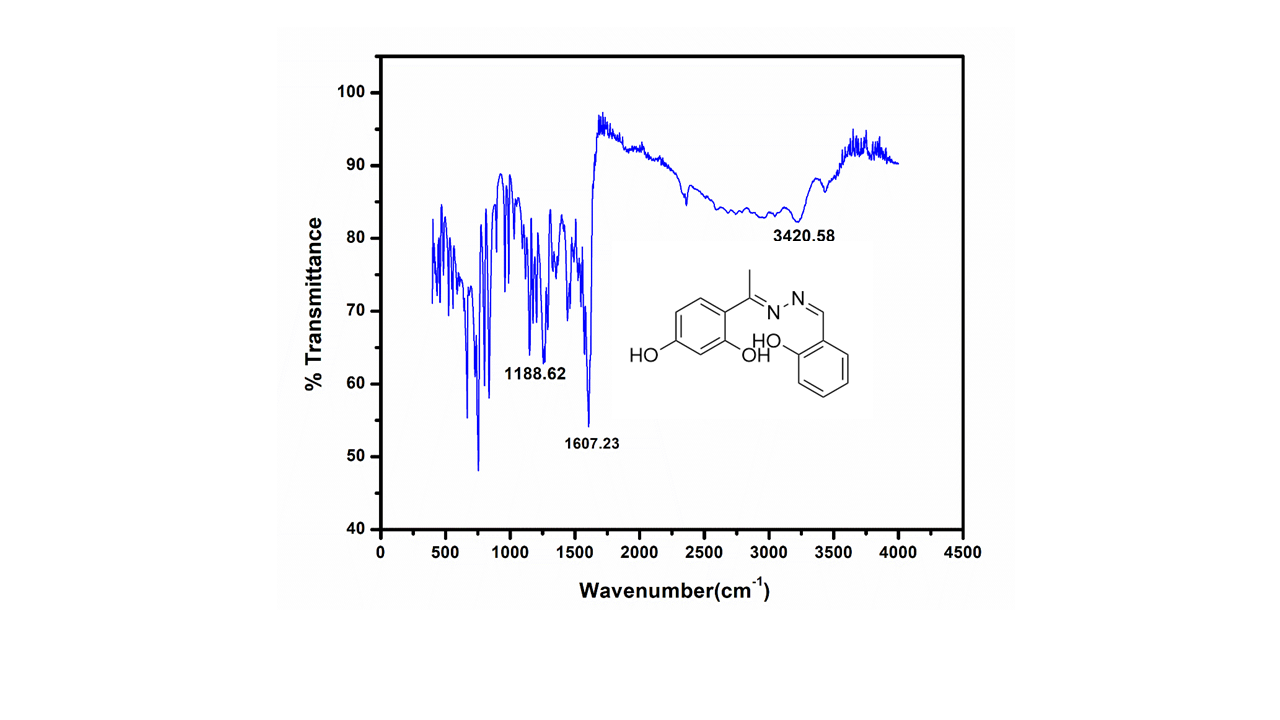


**Figure S2**. FTIR spectrum of **L1**.

**Figure S3**.1H-NMR spectrum for **L1** in DMSO.

**Figure S4**. 13C-NMR spectrum for **L1** in DMSO.


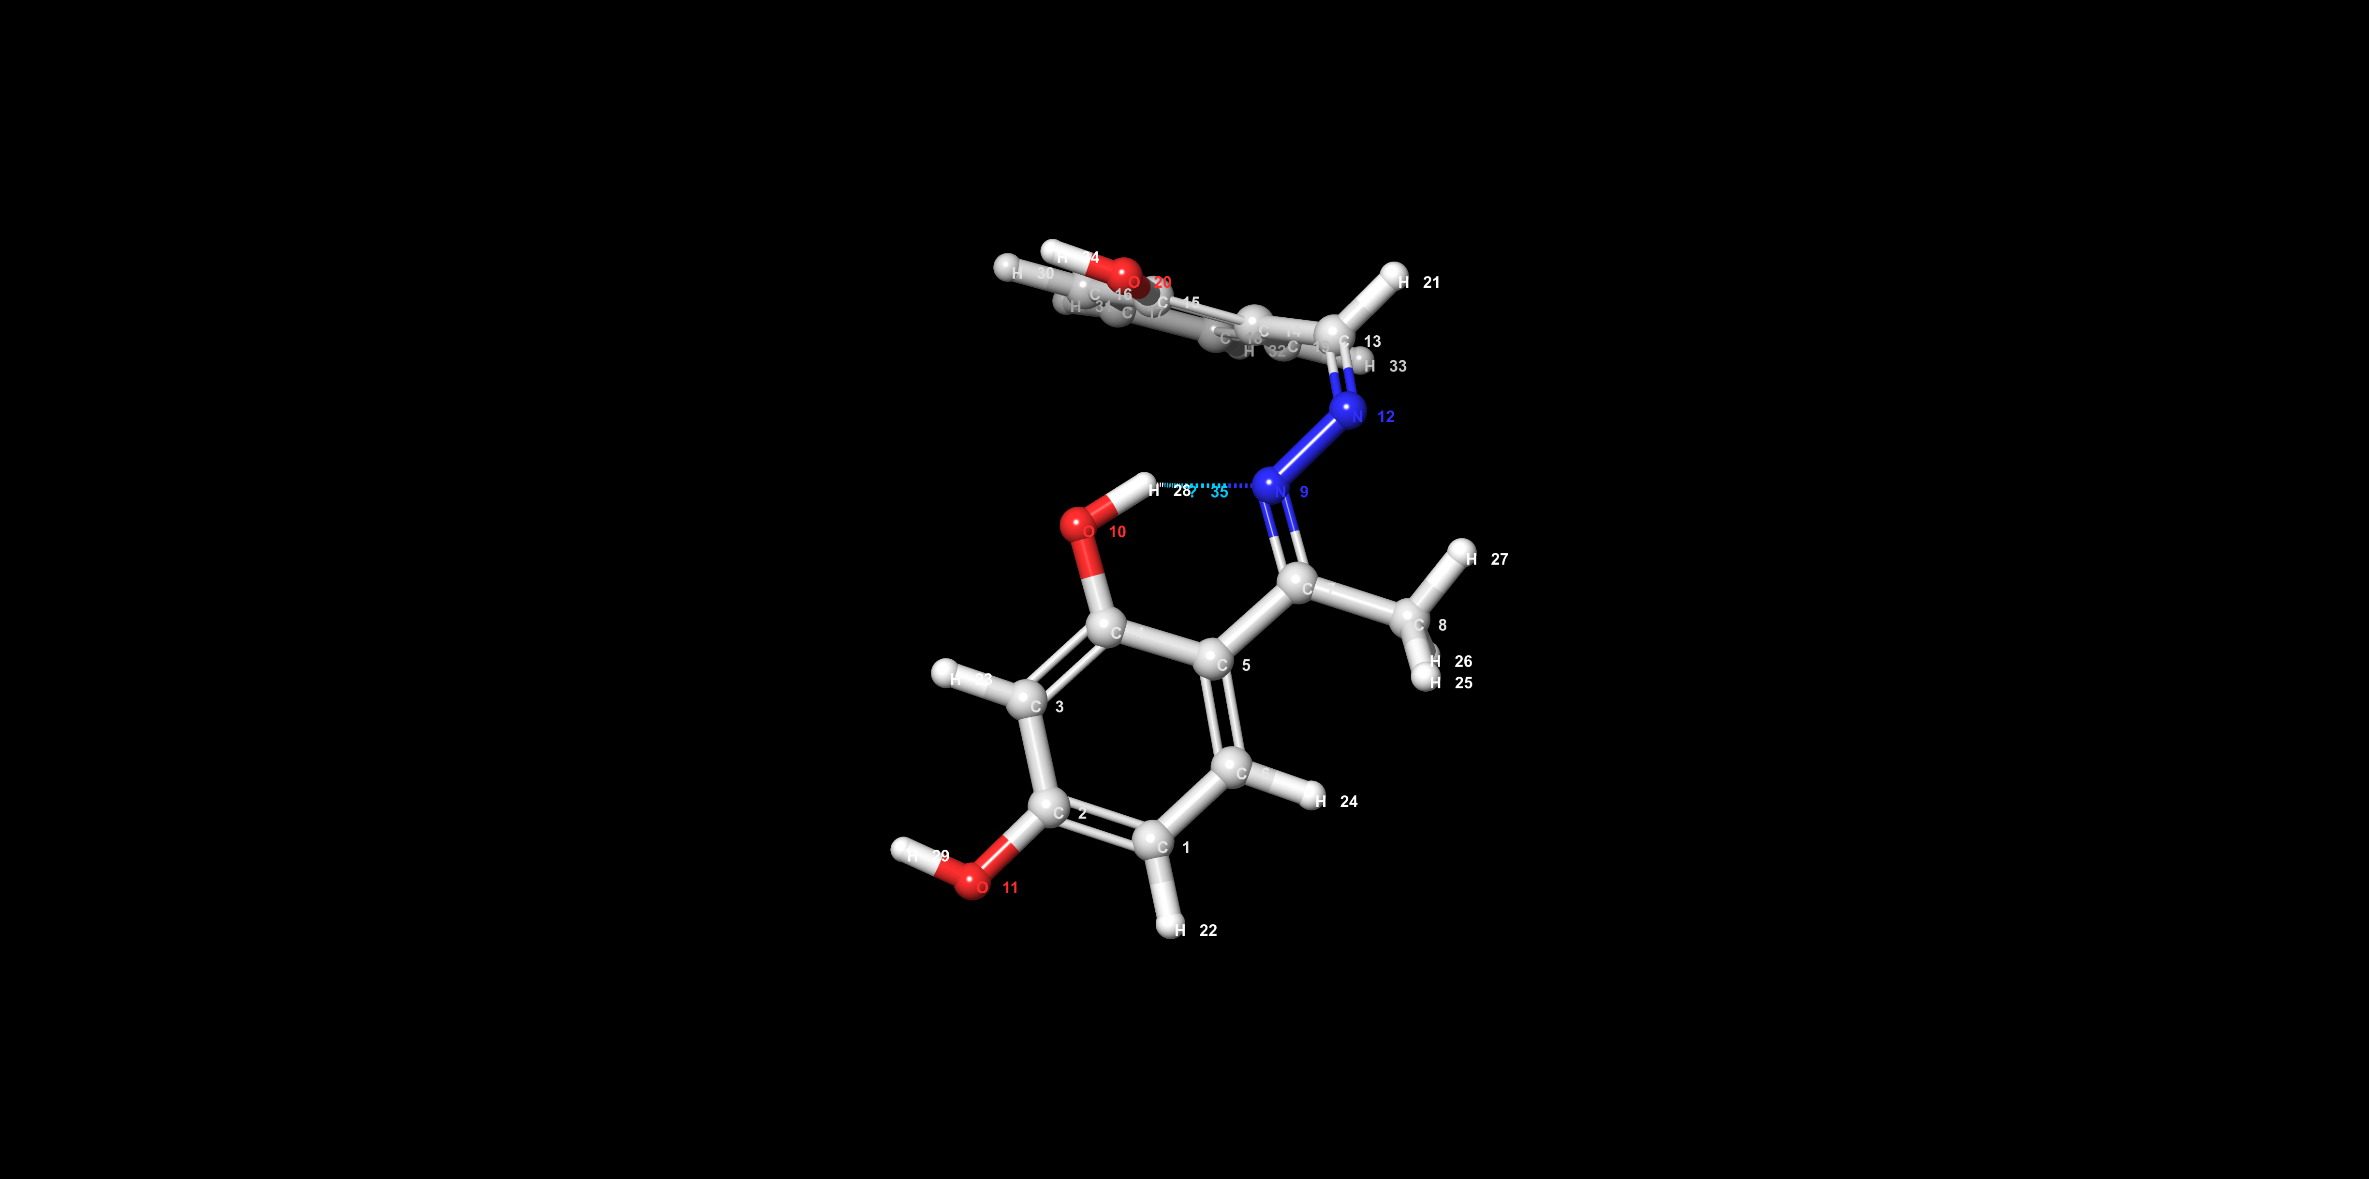


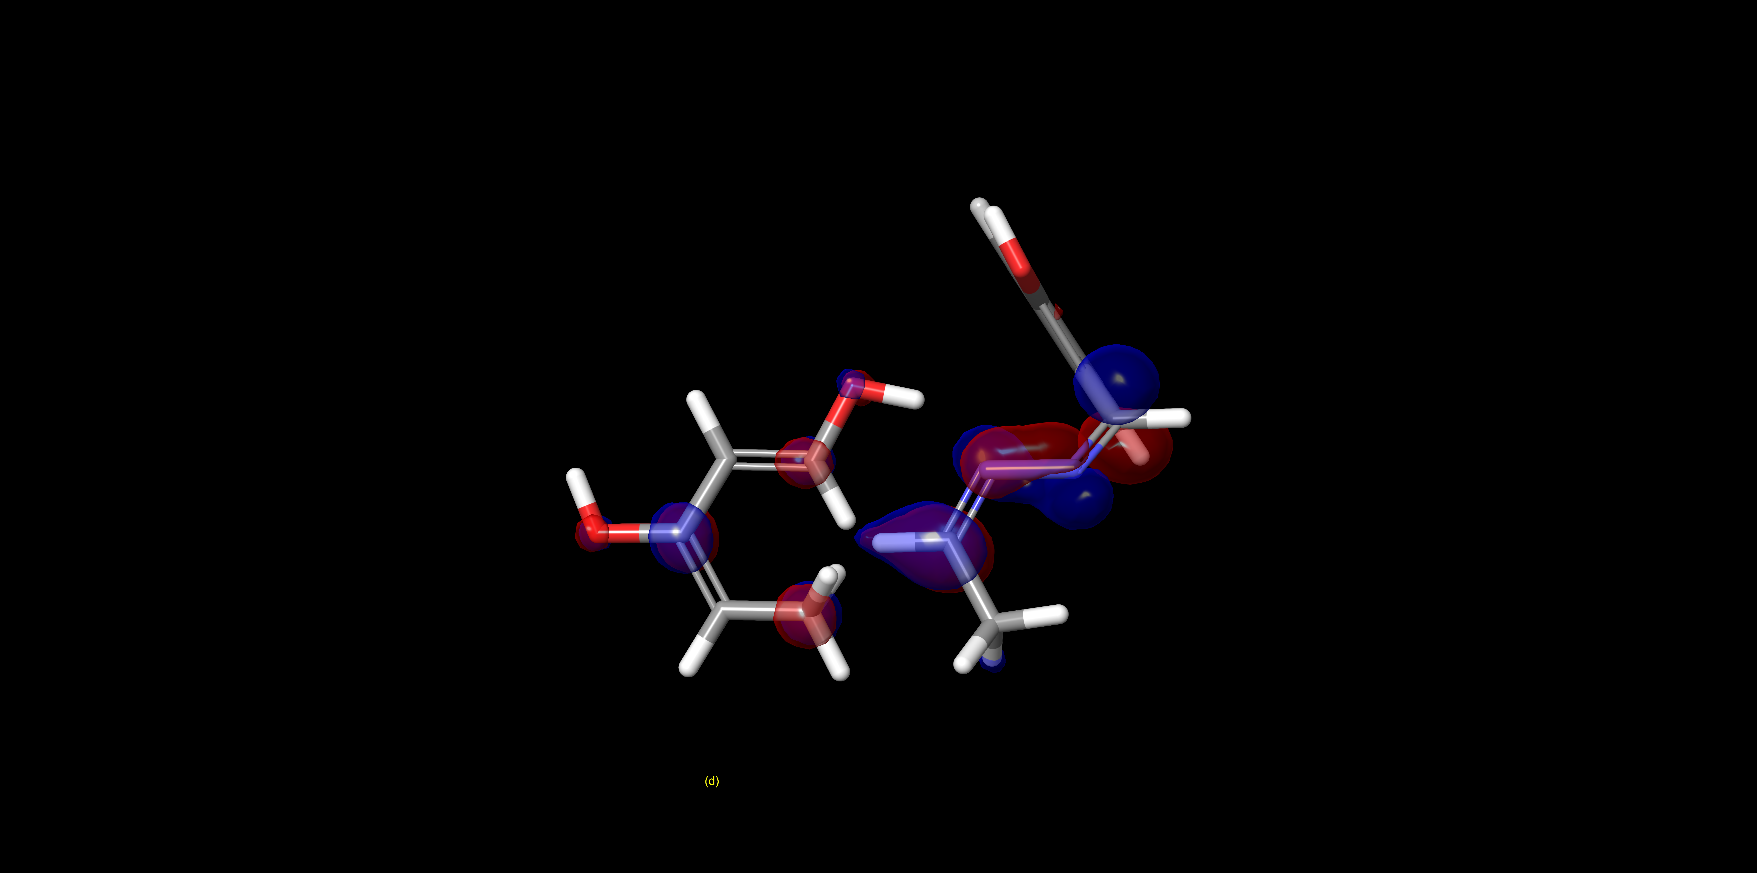
**Figure S5.** Optimized geometry of ligand **L1**, showing the atomic numbering
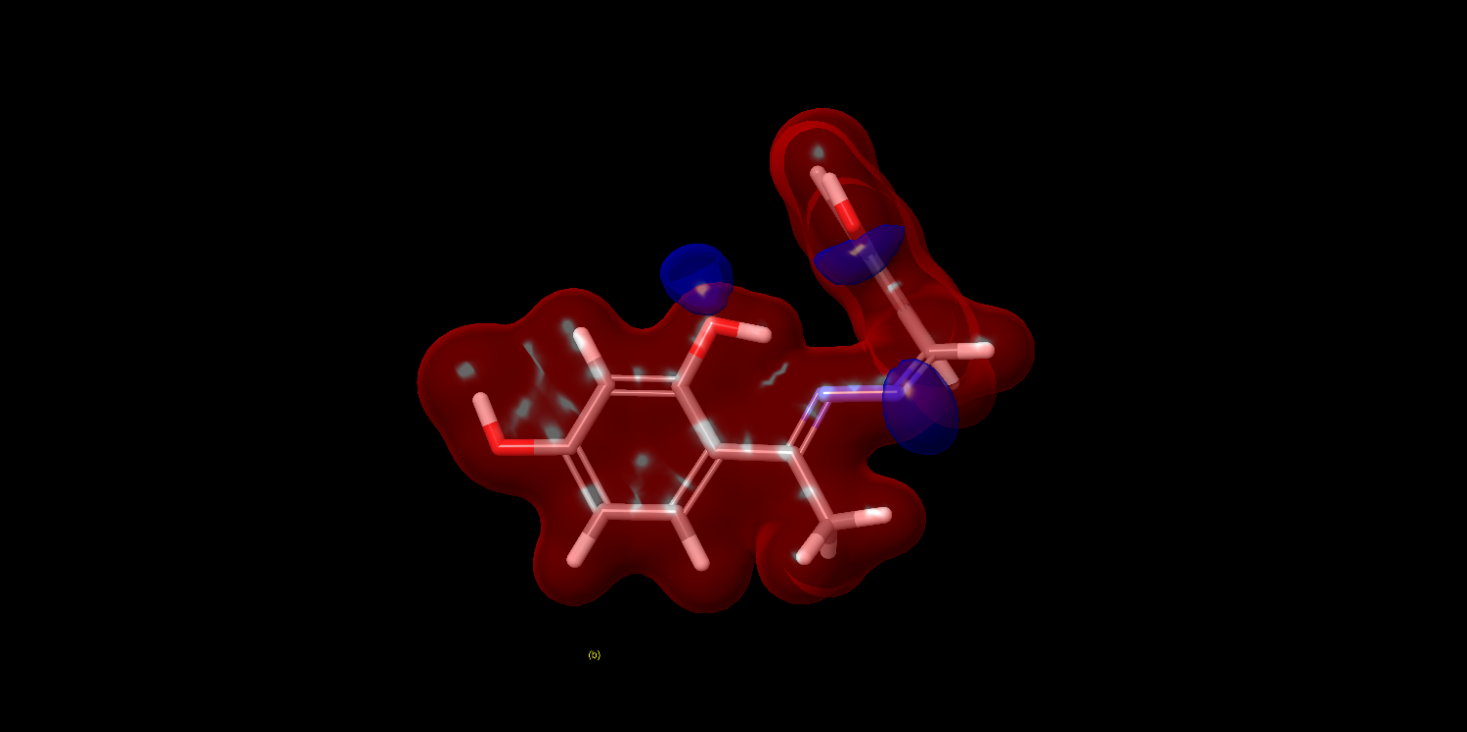

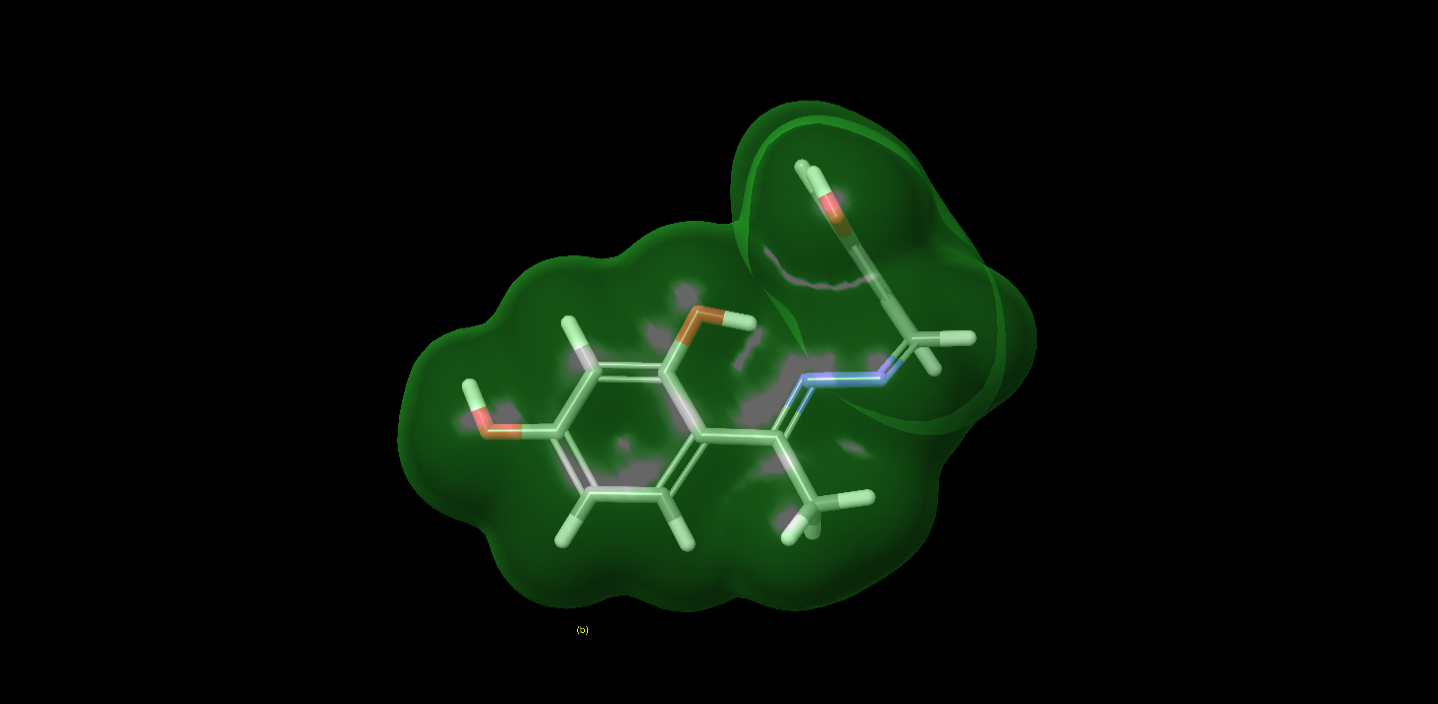

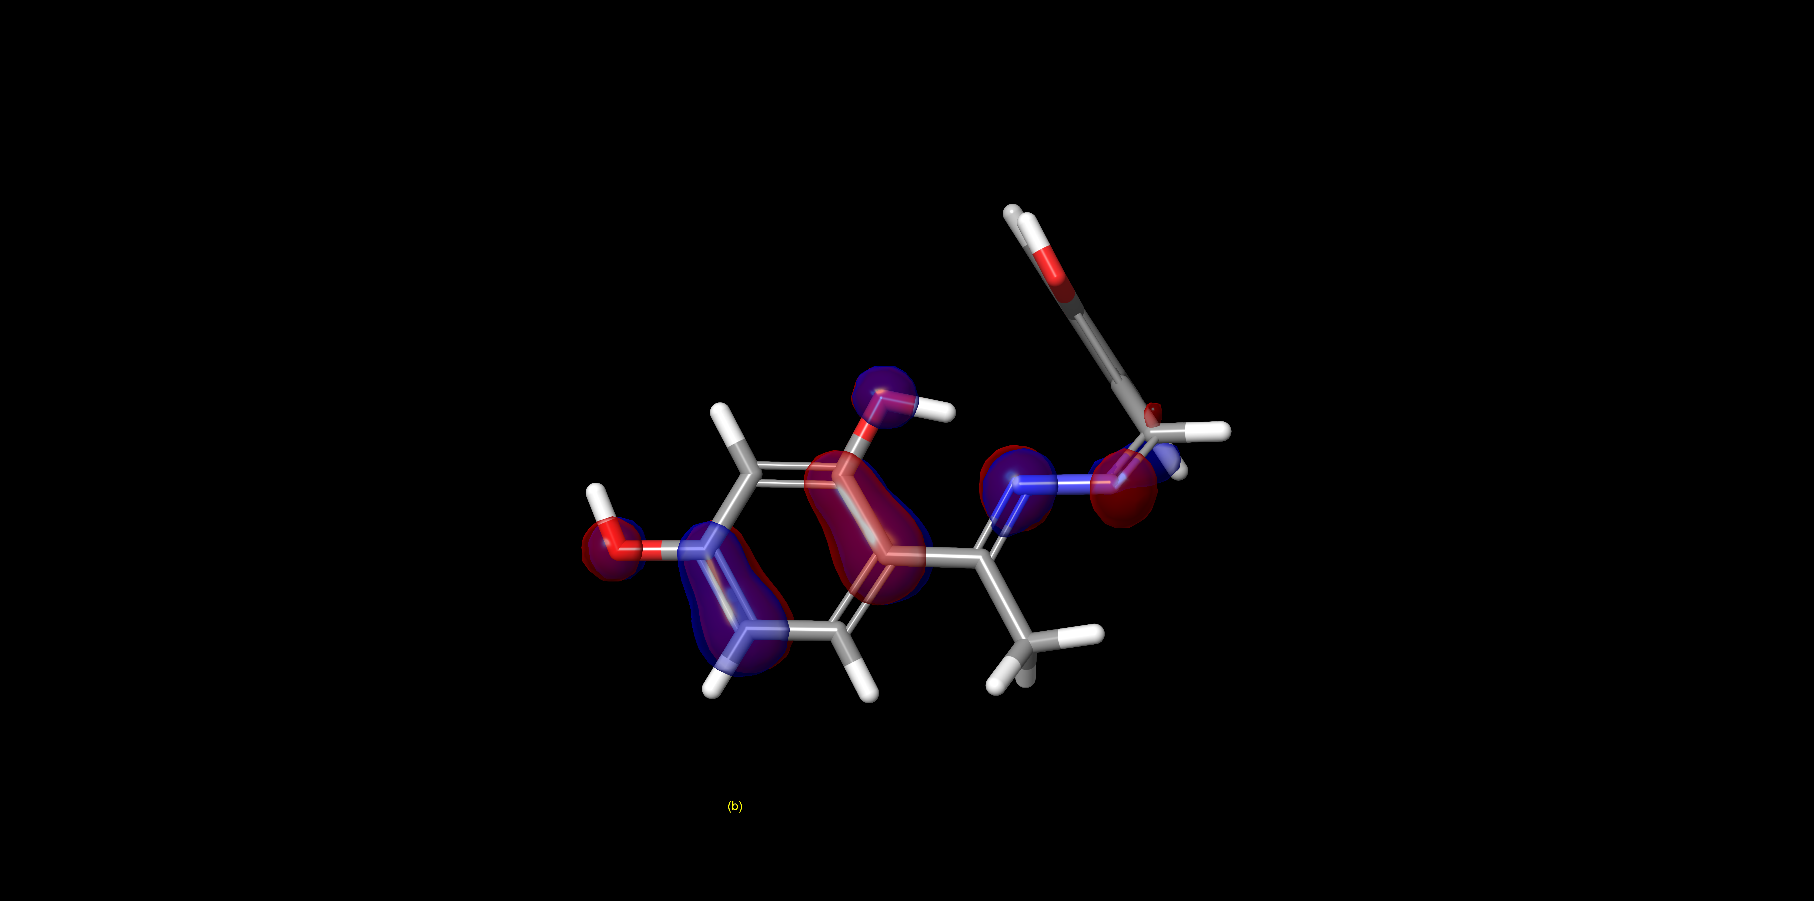
.

**d**

**c**

**b**

**a**

εHOMO = -6.198 eV εLUMO = -1.906 eV

**Figure S6.** (a) Electron density (isovalue = 0.001 electrons/bohr3) (b) molecular electrostatic potential (ESP) (isovalue = -42.9541 kcal mol-1) (c) Highest occupied molecular orbital (HOMO) and (d) Lowest unoccupied molecular orbital (LUMO) (isovalue = -0.05 au) of ligand **L1.**


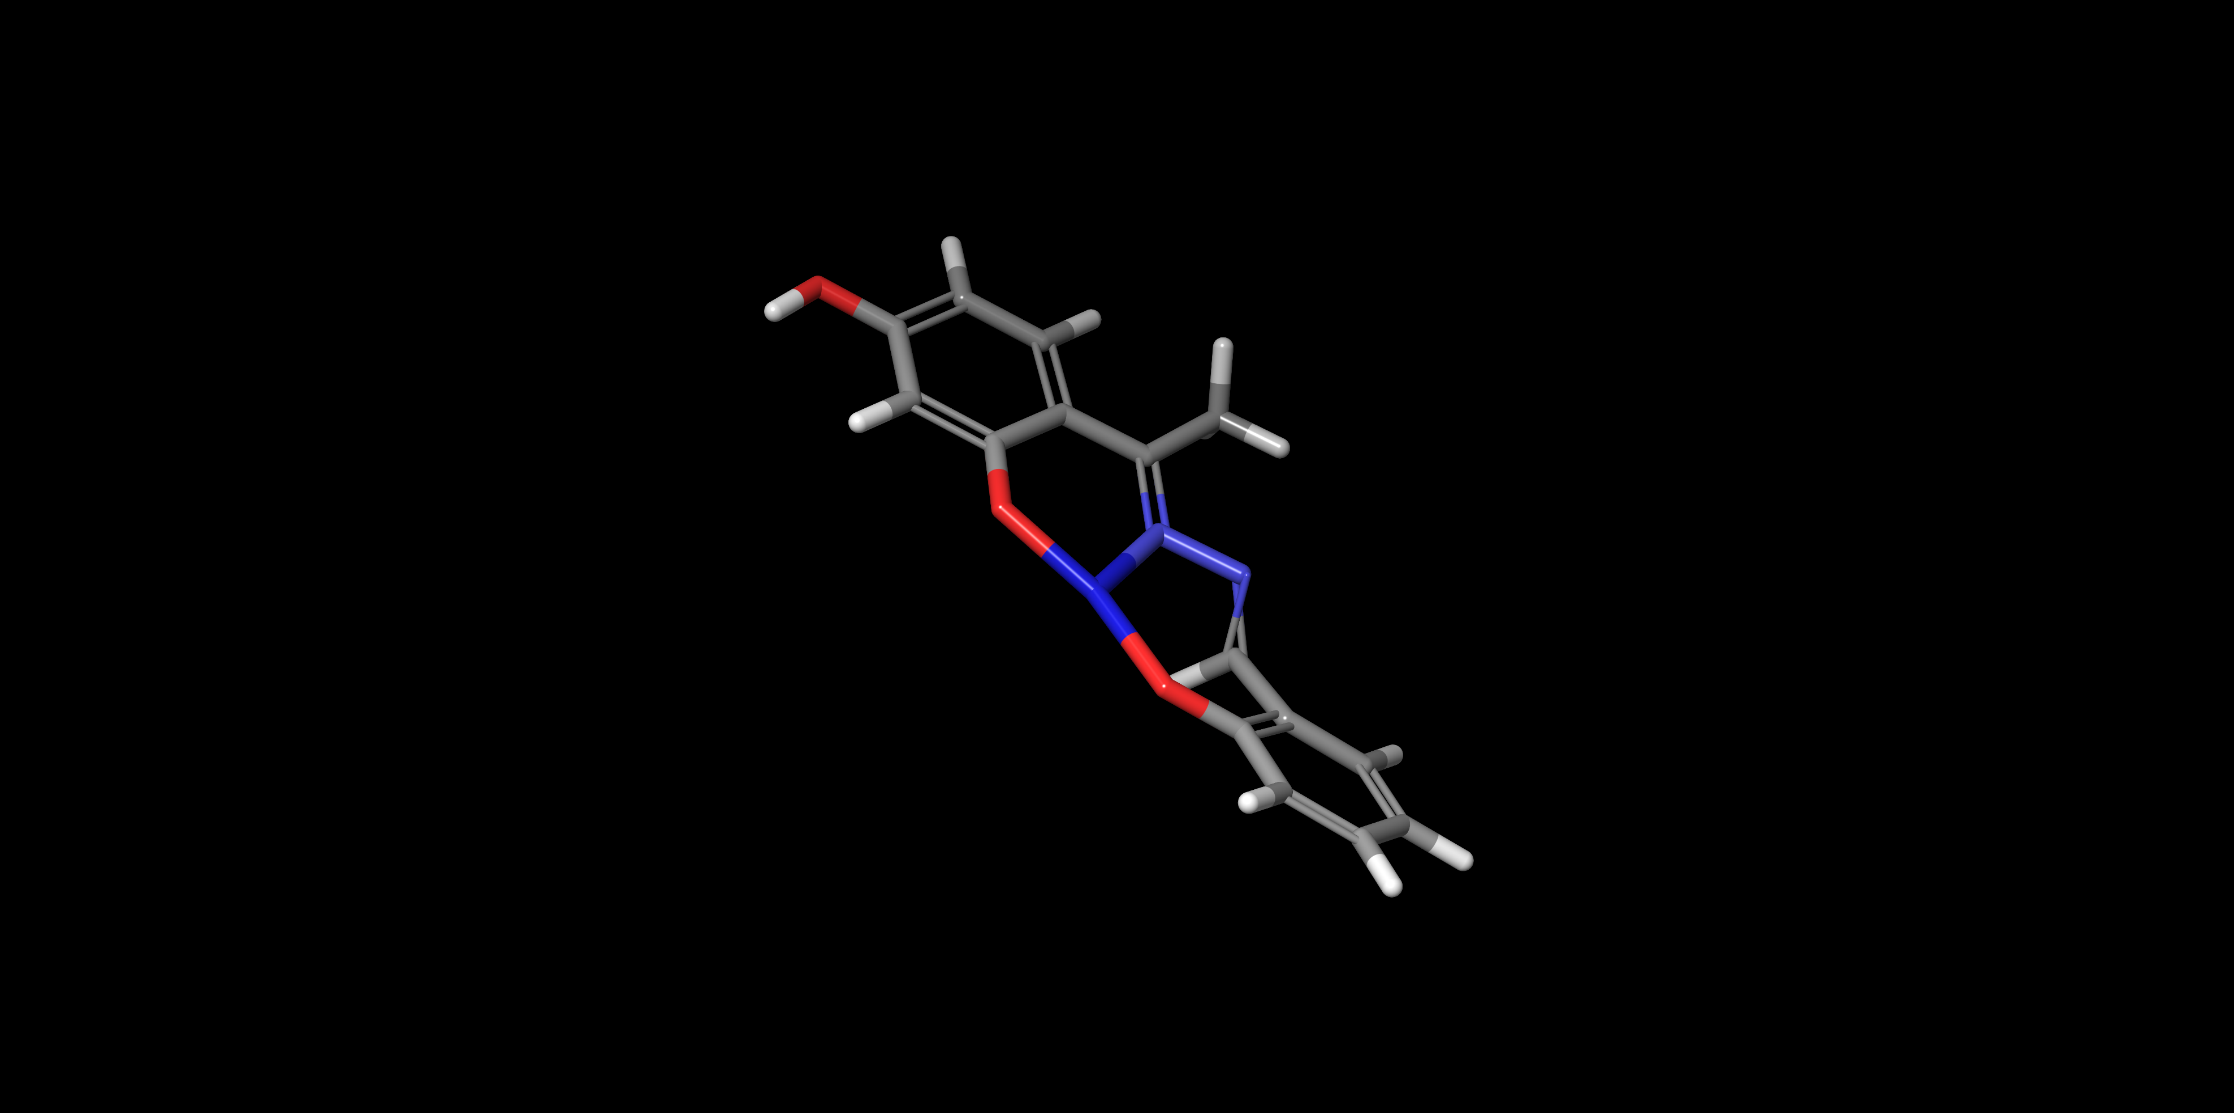


**Figure S7.** Optimized geometry of the copper complex.

**α-orbitals**


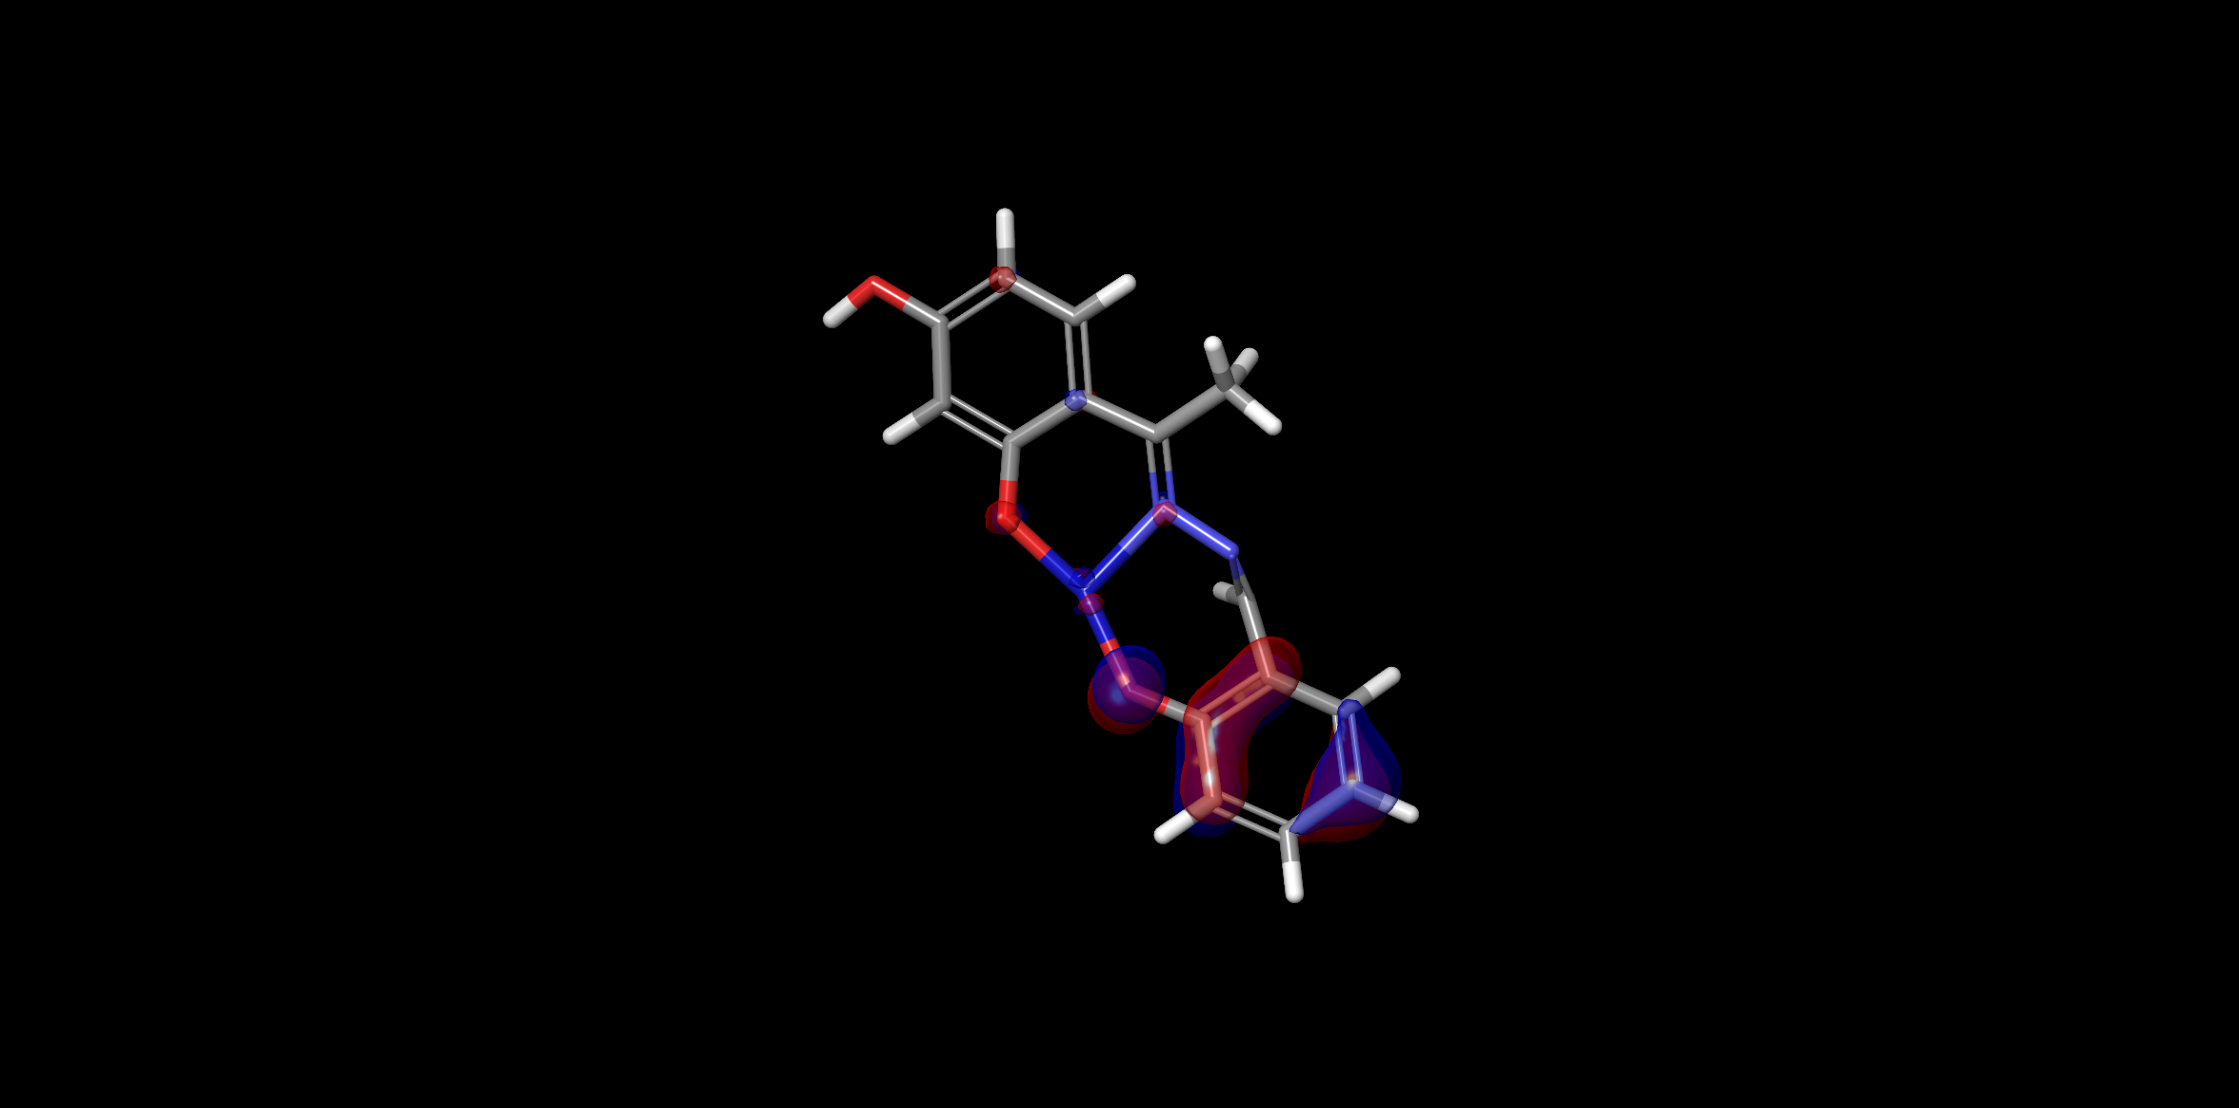

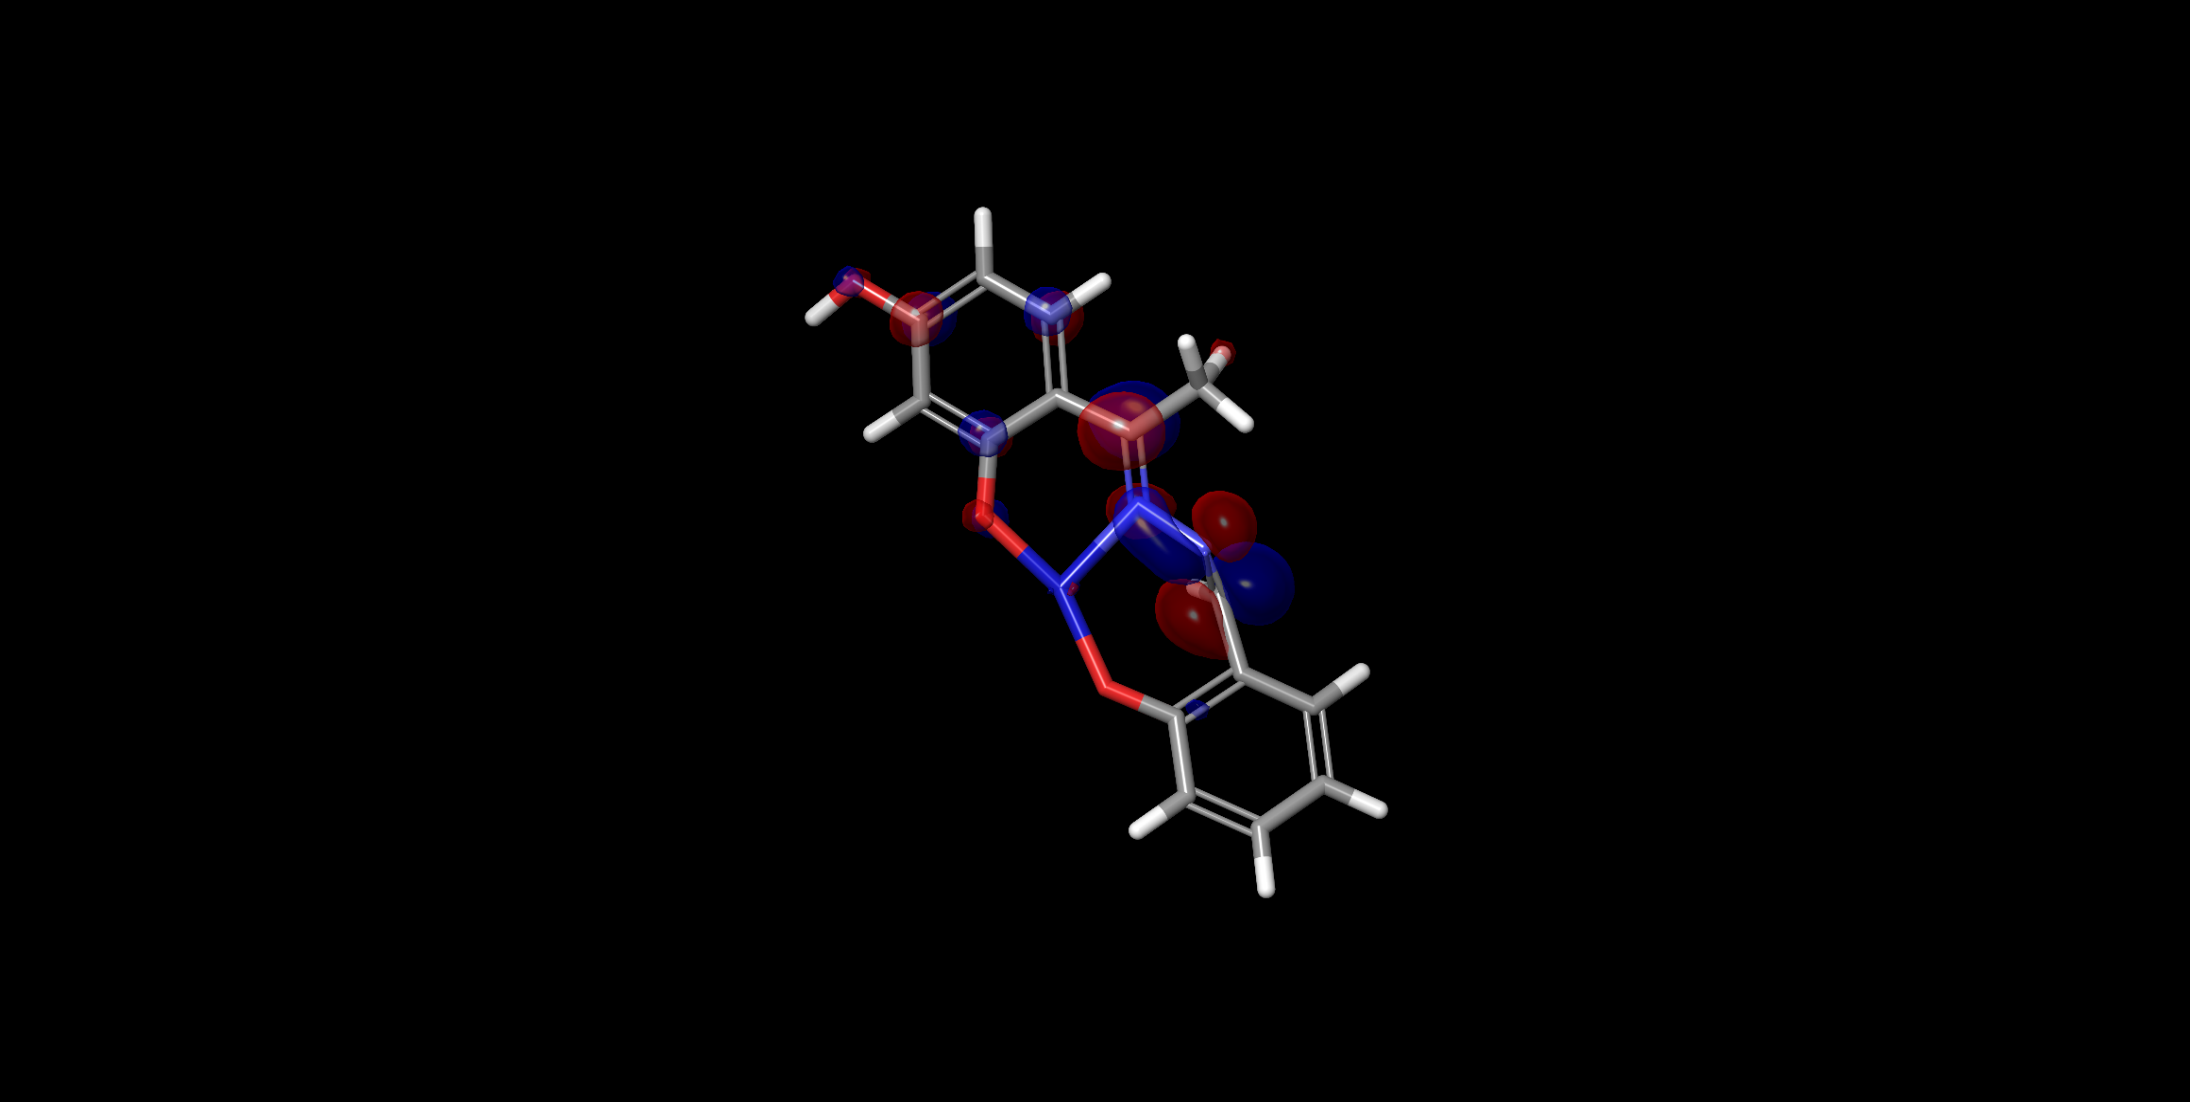


εHOMO = -6.023 eV εLUMO = -2.346 eV

**β-orbitals**


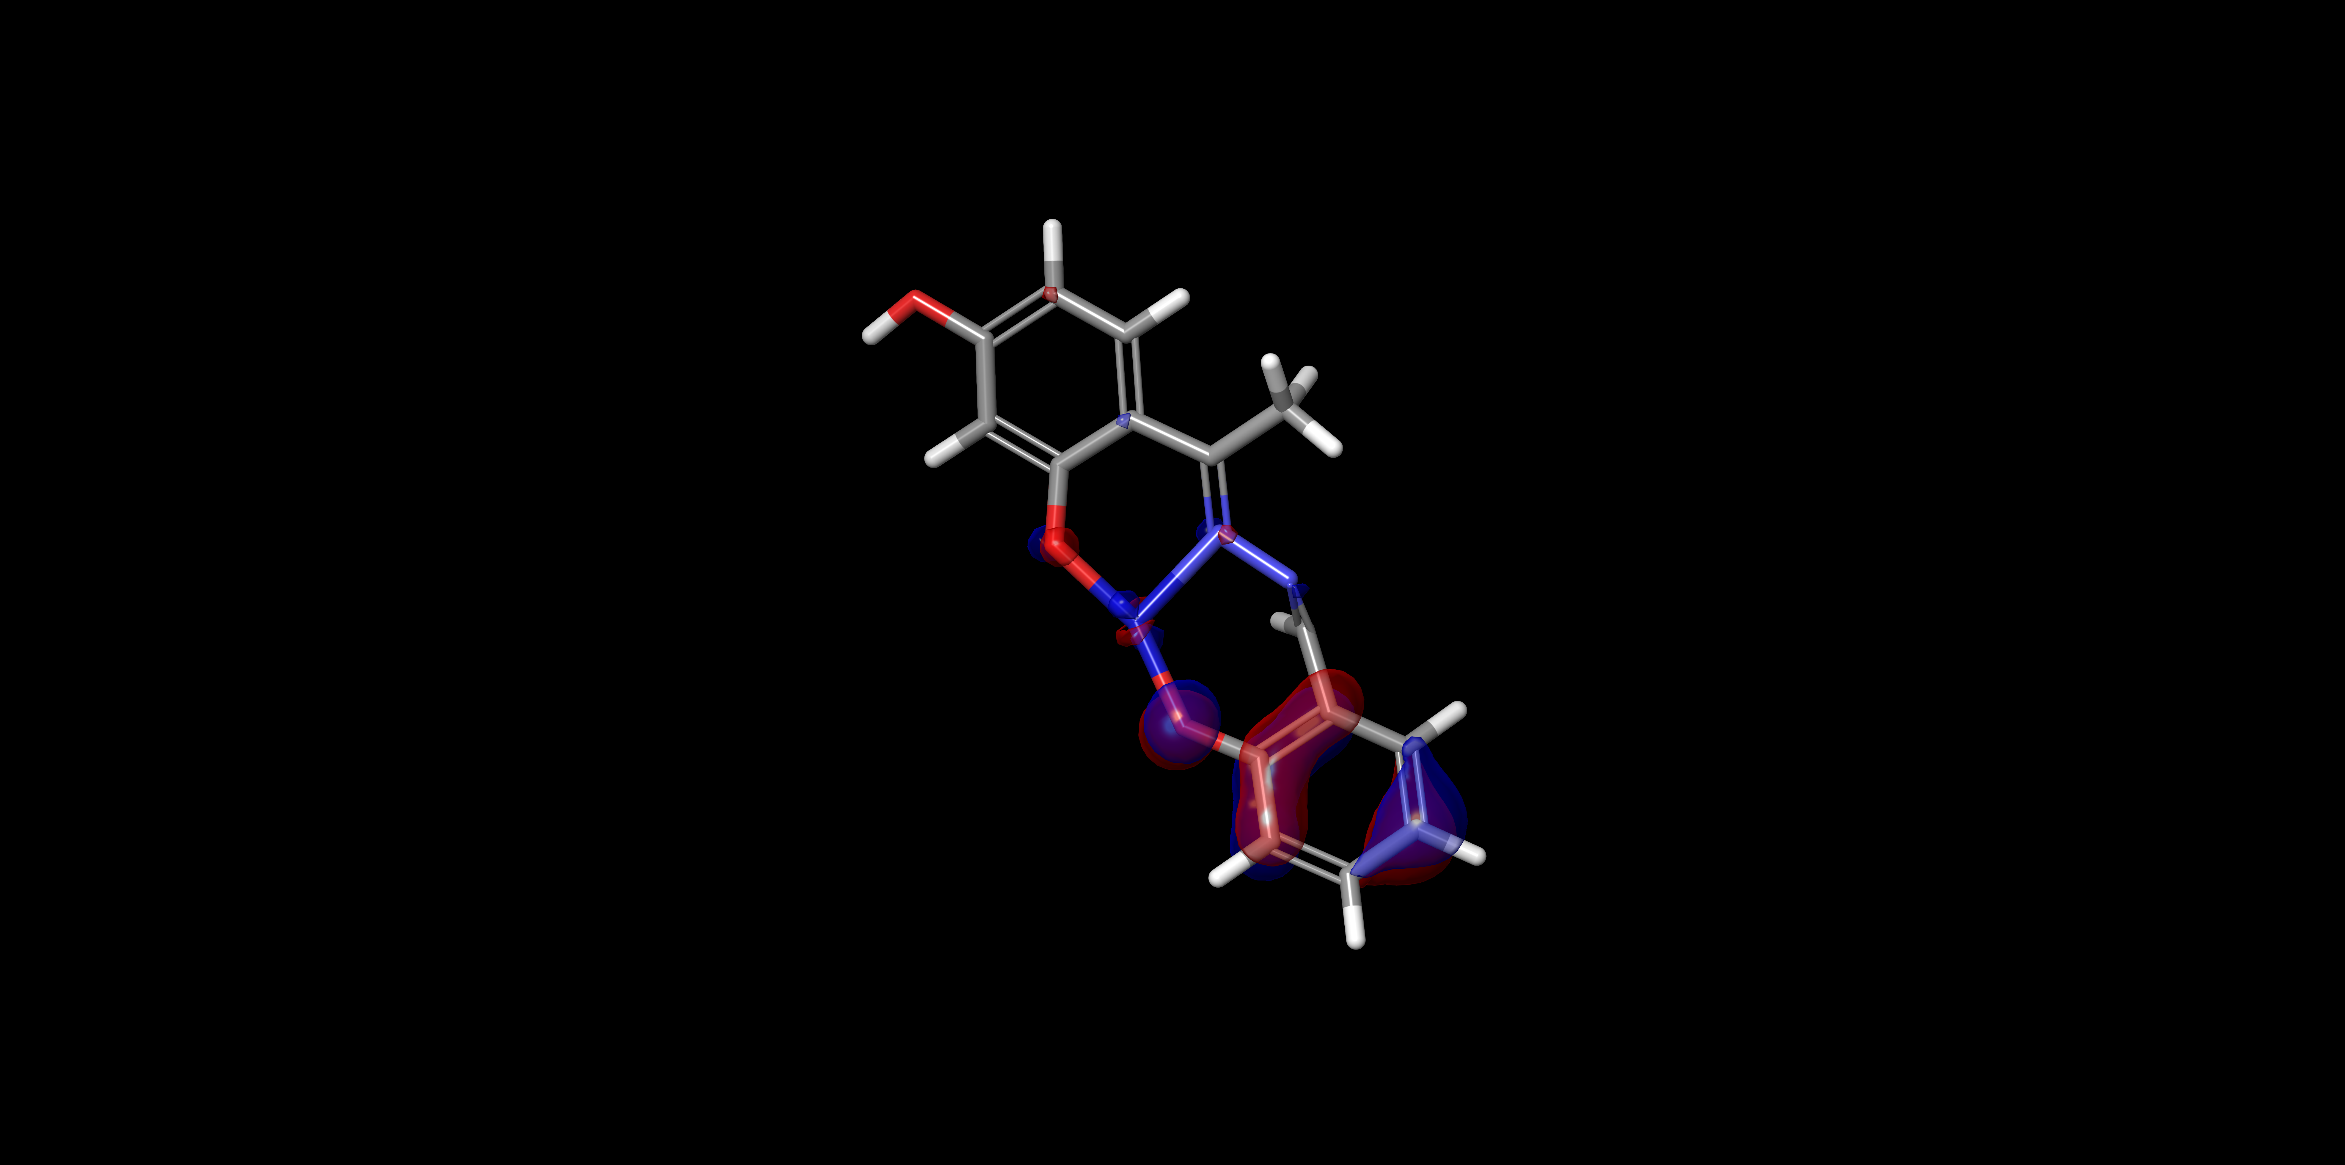

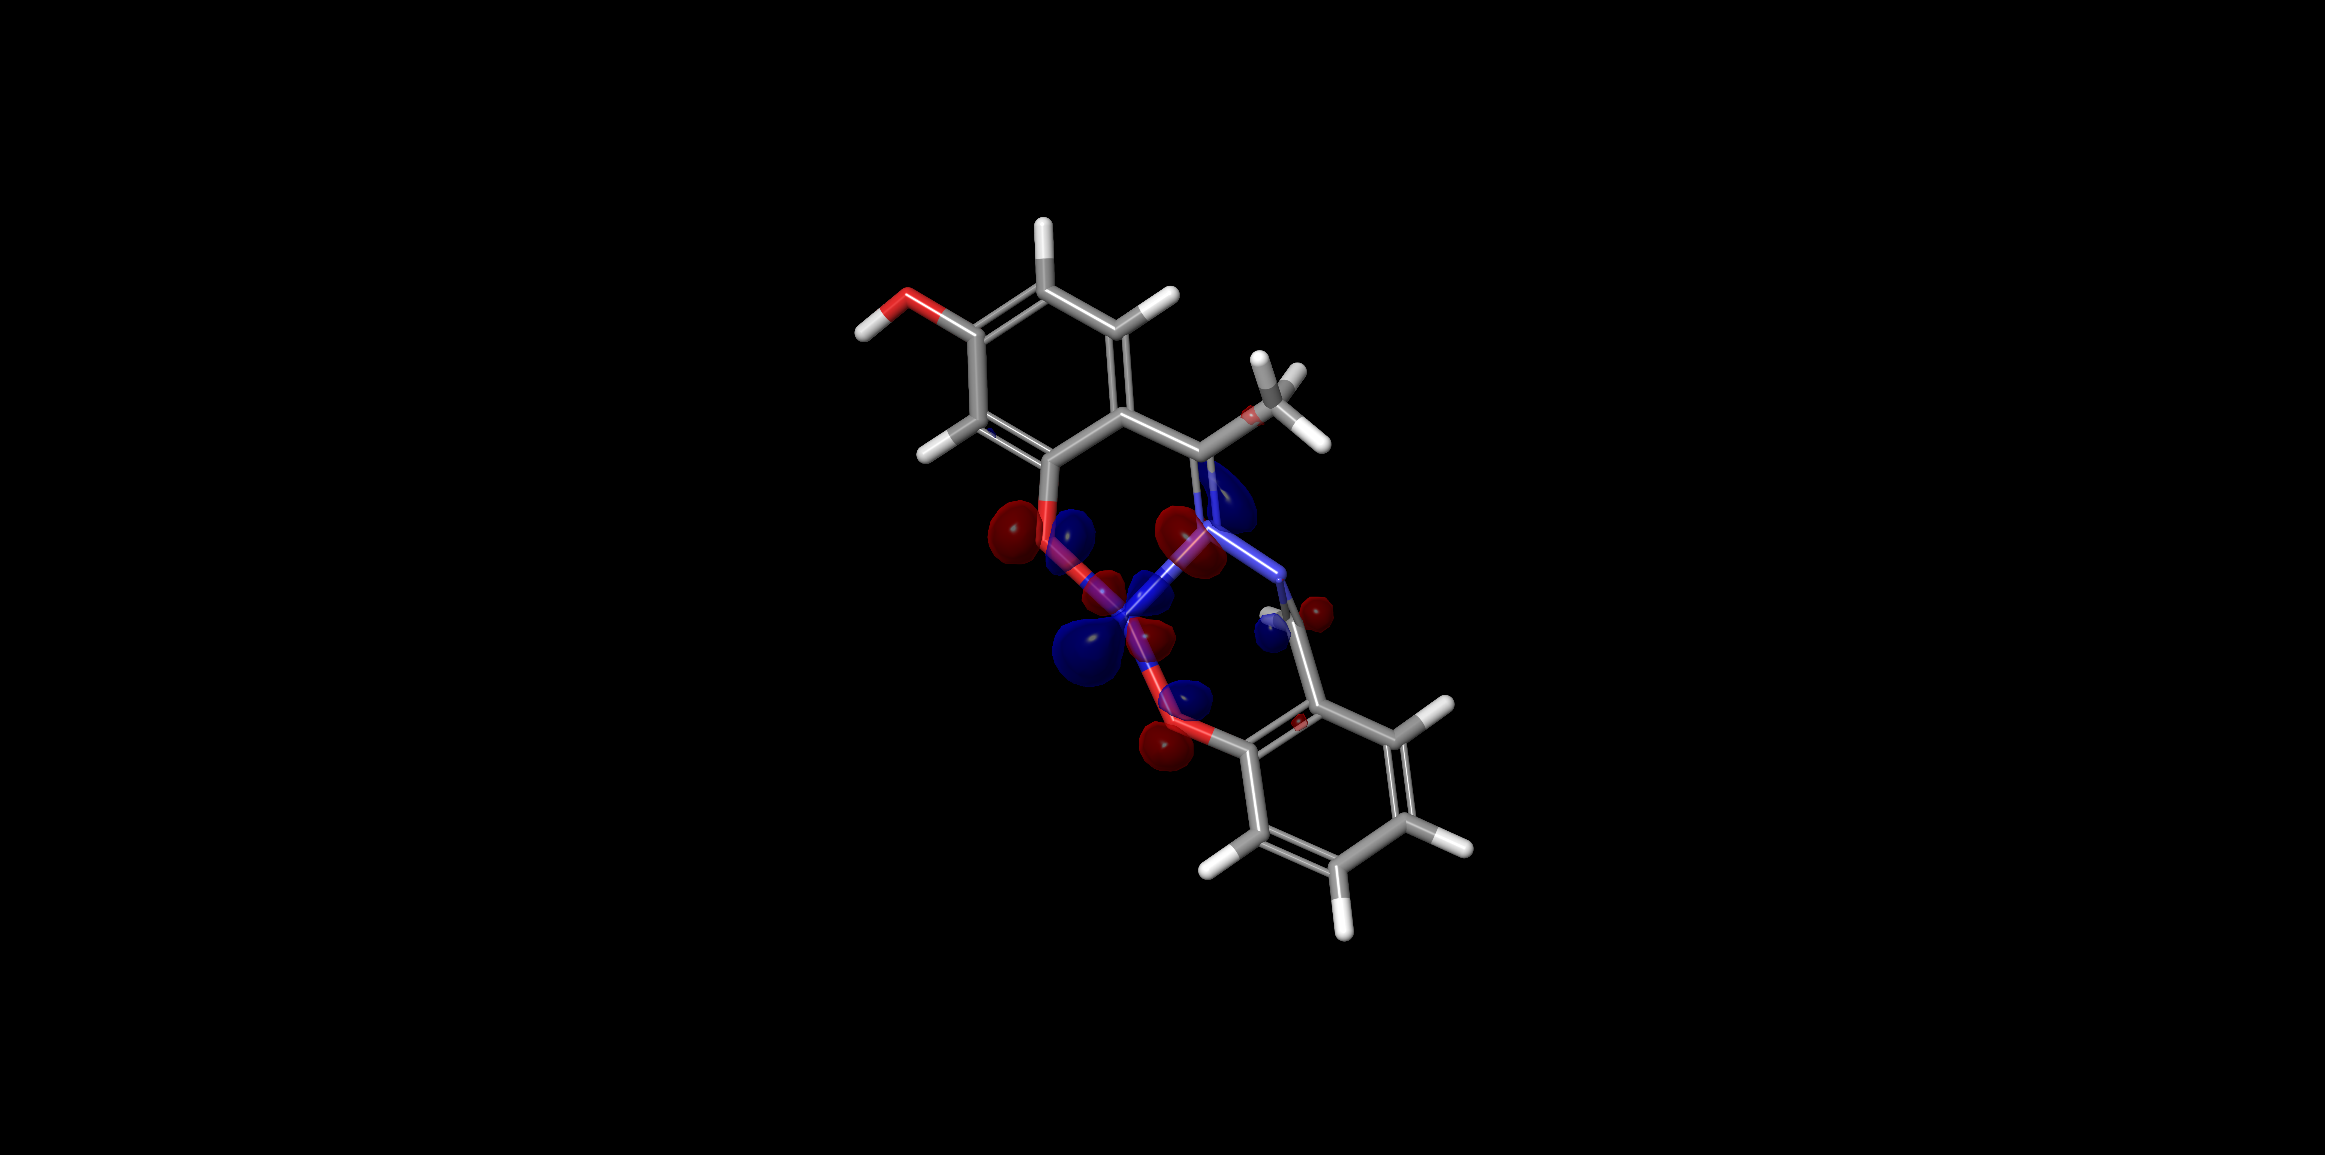


εHOMO = -5.991 eV εLUMO = -4.274 eV

**Figure S8:** HOMOs and LUMOs for the two spin states of copper complex .

**Table S1.** Excitation energies and oscillator strengths of ligand **L1.**

| **Excitation** | **Transition** | **Weight (%)** | **Excitation Energy (eV)** | **Wavelength (nm)** | **Oscillator Strength (*f*)** |
| --- | --- | --- | --- | --- | --- |
| 1 | HOMO→LUMO | 88 | 3.60 | 345 | 0.1290 |
| 2 | HOMO-1→LUMO | 78 | 3.94 | 314 | 0.2929 |
| 4 | HOMO-1→LUMO+1 | 39 | 4.41 | 281 | 0.0525 |
| 5 | HOMO-3→LUMO | 33 | 4.56 | 272 | 0.3128 |
| 6 | HOMO→LUMO+1 | 50 | 4.65 | 266 | 0.0591 |
| 7 | HOMO-4→LUMO | 57 | 4.92 | 252 | 0.1295 |
| 8 | HOMO-2→LUMO+1 | 36 | 4.96 | 250 | 0.0244 |
| 9 | HOMO-3→LUMO+1 | 50 | 5.17 | 240 | 0.0298 |
| 11 | HOMO-3→LUMO+1 | 26 | 5.45 | 227 | 0.0349 |
